# Supplementary material for: Folding and structural polymorphism of G-quadruplex formed from a long telomeric sequence containing six GGG tracts
Source: Royal Society of Chemistry journal article supplement (doi:10.1039/c4ra08053j), 2014-01-01
Supplement: c4ra08053j1.pdf [file c4ra08053j1.pdf]

**Supplementary Information**

**Folding and Structural Polymorphism of G-quadruplex Formed  
from a Long Telomeric Sequence Containing Six GGG tracts**

*Atsushi Tanaka, Jungkweon Choi,\*<sup>a</sup> and Tetsuro Majima\**

The Institute of Scientific and Industrial Research (SANKEN), Osaka University, Mihogaoka  
8-1, Ibaraki, Osaka 567-0047, Japan.

<sup>a</sup> Present address: Center for Nanomaterials and Chemical Reactions, Institute for Basic Science (IBS), Daejeon 305-701, Republic of Korea.

## Experimental Section

**Determination of Thermodynamic Parameters:** In order to correct melting curves regarding lower and higher baselines, we used the equation below:

$$A_{295nm} = \frac{\left( (a+bx) + (c+dx) \exp\left( \frac{\Delta H}{R} \left( \frac{1}{T} - \frac{1}{T_m} \right) \right) \right)}{1 + \exp\left( \frac{\Delta H}{R} \left( \frac{1}{T} - \frac{1}{T_m} \right) \right)} \quad (S1)$$

where  $A_{295nm}$  is the normalized absorbance observed at 295 nm;  $a + bx$  and  $c + dx$  are the linear functions of the two baselines;  $\Delta H$ ,  $R$ ,  $T$  and  $T_m$  are the enthalpy, gas constant, temperature and melting temperature, respectively.

The Gibbs free energy ( $\Delta G$ ) and entropy ( $\Delta S$ ) and at 25°C were calculated by

$$\Delta G_{298K} = T \Delta H \left( \frac{1}{T} - \frac{1}{T_m} \right) \quad (S2)$$

$$\Delta S = \frac{\Delta H - \Delta G}{T} \quad (S3)$$

The acquired thermodynamic parameters are summarized in Table S1.

**Fluorescence correlation spectroscopy (FCS):** FCS experiments carried out with a time-resolved fluorescence microscope using confocal optics (MicroTime 200; PicoQuant, Berlin-Adlershof, Germany). We used 2 nM sample solutions for measuring FCS curves with various concentrations of  $K^+$  ions. In order to measure the molecular diffusion time, 60  $\mu$ L of DNA solution was loaded into the micro-chamber made by a 1-inch glass cover slip and Secure-Seal (S24733, Invitrogen). The FAM of samples were excited through an oil objective (Olympus, UAPON 150XOTIRF; 1.45 NA, 150x) with a 485 nm pulsed laser (PicoQuant, full width at half-maximum 120 ps) controlled by a PDL-800B driver (PicoQuant). The excitation power of 33  $\mu$ W was used and photons were collected into 1 ms bins for 1 hour. The fluorescence was collected with the same objective and detected by a single photon avalanche photodiode (Micro Photon Devices, PDM 50CT and 100CT) through a dichroic beam splitter, bandpass filter (Olympus, D680/40M), and 75  $\mu$ m pinhole for spatial filtering to reject out-of-focus signals. The data collected using the PicoHarp 300 TCSPC module (PicoQuant) were stored in the time-tagged time-resolved mode (TTTR), recording every detected photon with its individual timing, which were used for the single-molecule analysis. In FCS, the autocorrelation function of the fluorescence intensity,  $G(\tau)$ , is given by

$$G(\tau) = \frac{\langle I(t) \cdot I(t + \tau) \rangle}{\langle I(t) \rangle^2} \quad (\text{S4})$$

where  $I(t)$  is the fluorescence intensity at time  $t$ ,  $I(t + \tau)$  is the fluorescence intensity after a time lag  $\tau$ , and  $\langle \rangle$  denotes the time average over the total observation time.

**Table S1.**  $K_{1/2}^+$  and  $n$  values for G-quadruplex-forming sequences determined by  $E_{\text{FRET}}$  and CD intensities ( $I_{\text{CD}}$ ).

| Sequences     | Monitored parameter | $n$           | $K_{1/2}^+$      |
|---------------|---------------------|---------------|------------------|
| <i>25htel</i> | $E_{\text{FRET}}$   | $1.8 \pm 0.1$ | $10.1 \pm 0.4$   |
| <i>37htel</i> |                     | $0.7 \pm 0.1$ | $117.0 \pm 21.7$ |
| I-1/2         |                     | $0.7 \pm 0.1$ | $132.3 \pm 26.2$ |
| I-1/6         |                     | $1.0 \pm 0.1$ | $239.3 \pm 49.4$ |
| I-4/5         |                     | $1.1 \pm 0.1$ | $77.5 \pm 5.1$   |
| I-4/6         |                     | $1.1 \pm 0.1$ | $154.4 \pm 15.3$ |
| I-5/6         |                     | $0.7 \pm 0.1$ | $271.6 \pm 57.5$ |
| <i>37htel</i> | $I_{\text{CD}}$     | $1.5 \pm 0.1$ | $14.1 \pm 1.1$   |
| I-1/2         |                     | $1.8 \pm 0.1$ | $10.3 \pm 0.3$   |
| I-1/6         |                     | $1.9 \pm 0.1$ | $22.9 \pm 1.2$   |
| I-4/5         |                     | $3.3 \pm 0.1$ | $62.7 \pm 0.9$   |
| I-4/6         |                     | $3.1 \pm 0.1$ | $60.3 \pm 2.3$   |
| I-5/6         |                     | $1.6 \pm 0.1$ | $18.0 \pm 1.0$   |

**Table S2.** Melting temperatures ( $T_m$ ) and thermodynamic parameters of G-quadruplex-forming sequences determined at various  $[K^+]$ .

| Sequences     | $[K^+]$<br>(mM) | $T_m$<br>(K) | $-\Delta G_{298K}$<br>(kcal mol <sup>-1</sup> ) | $\Delta H$<br>(kcal mol <sup>-1</sup> ) | $\Delta S$<br>(cal K <sup>-1</sup> ·mol <sup>-1</sup> ) |
|---------------|-----------------|--------------|-------------------------------------------------|-----------------------------------------|---------------------------------------------------------|
| <i>37htel</i> | 60              | 315          | $1.98 \pm 0.01$                                 | $36.7 \pm 0.2$                          | $117 \pm 1$                                             |
|               | 120             | 323          | $3.08 \pm 0.01$                                 | $39.8 \pm 0.2$                          | $123 \pm 1$                                             |
|               | 170             | 332          | $3.64 \pm 0.02$                                 | $35.6 \pm 0.2$                          | $107 \pm 1$                                             |
|               | 320             | 341          | $5.20 \pm 0.02$                                 | $41.2 \pm 0.2$                          | $121 \pm 1$                                             |
|               | 520             | 345          | $6.93 \pm 0.27$                                 | $50.0 \pm 2.0$                          | $144 \pm 6$                                             |
| I-1/2         | 60              | 318          | $2.71 \pm 0.04$                                 | $43.9 \pm 0.5$                          | $138 \pm 2$                                             |
|               | 120             | 325          | $3.54 \pm 0.03$                                 | $42.8 \pm 0.4$                          | $132 \pm 1$                                             |
|               | 170             | 329          | $4.09 \pm 0.05$                                 | $42.9 \pm 0.5$                          | $130 \pm 2$                                             |
|               | 320             | 338          | $4.35 \pm 0.06$                                 | $36.4 \pm 0.6$                          | $107 \pm 2$                                             |
|               | 520             | 347          | $4.73 \pm 0.07$                                 | $33.4 \pm 0.7$                          | $96 \pm 2$                                              |
| I-1/6         | 60              | 308          | $1.24 \pm 0.01$                                 | $38.2 \pm 0.2$                          | $124 \pm 1$                                             |
|               | 120             | 319          | $2.11 \pm 0.02$                                 | $32.0 \pm 0.2$                          | $100 \pm 1$                                             |
|               | 170             | 324          | $2.75 \pm 0.02$                                 | $34.3 \pm 0.2$                          | $106 \pm 1$                                             |
|               | 320             | 333          | $3.43 \pm 0.04$                                 | $32.7 \pm 0.3$                          | $98 \pm 1$                                              |
|               | 520             | 341          | $3.87 \pm 0.04$                                 | $30.7 \pm 0.3$                          | $90 \pm 1$                                              |
| I-4/5         | 60              | 303          | $0.54 \pm 0.01$                                 | $32.5 \pm 0.2$                          | $107 \pm 1$                                             |
|               | 120             | 310          | $1.40 \pm 0.01$                                 | $36.2 \pm 0.2$                          | $117 \pm 1$                                             |
|               | 170             | 316          | $2.03 \pm 0.02$                                 | $35.6 \pm 0.3$                          | $113 \pm 1$                                             |
|               | 320             | 326          | $3.12 \pm 0.02$                                 | $36.4 \pm 0.2$                          | $112 \pm 1$                                             |
|               | 520             | 333          | $3.56 \pm 0.04$                                 | $33.7 \pm 0.4$                          | $101 \pm 1$                                             |
| I-4/6         | 60              | 300          | $0.29 \pm 0.01$                                 | $44.0 \pm 0.5$                          | $147 \pm 2$                                             |
|               | 120             | 308          | $1.42 \pm 0.01$                                 | $43.8 \pm 0.2$                          | $142 \pm 1$                                             |
|               | 170             | 313          | $1.89 \pm 0.01$                                 | $39.4 \pm 0.2$                          | $126 \pm 1$                                             |
|               | 320             | 325          | $2.78 \pm 0.01$                                 | $33.4 \pm 0.2$                          | $103 \pm 1$                                             |
|               | 520             | 333          | $3.59 \pm 0.01$                                 | $34.1 \pm 0.1$                          | $102 \pm 1$                                             |
| I-5/6         | 60              | 311          | $1.78 \pm 0.01$                                 | $42.5 \pm 0.3$                          | $137 \pm 1$                                             |
|               | 120             | 321          | $2.87 \pm 0.02$                                 | $40.0 \pm 0.3$                          | $125 \pm 1$                                             |
|               | 170             | 326          | $3.43 \pm 0.03$                                 | $40.0 \pm 0.4$                          | $123 \pm 1$                                             |
|               | 320             | 334          | $3.98 \pm 0.04$                                 | $37.0 \pm 0.4$                          | $111 \pm 1$                                             |
|               | 520             | 341          | $4.58 \pm 0.05$                                 | $36.3 \pm 0.4$                          | $106 \pm 1$                                             |

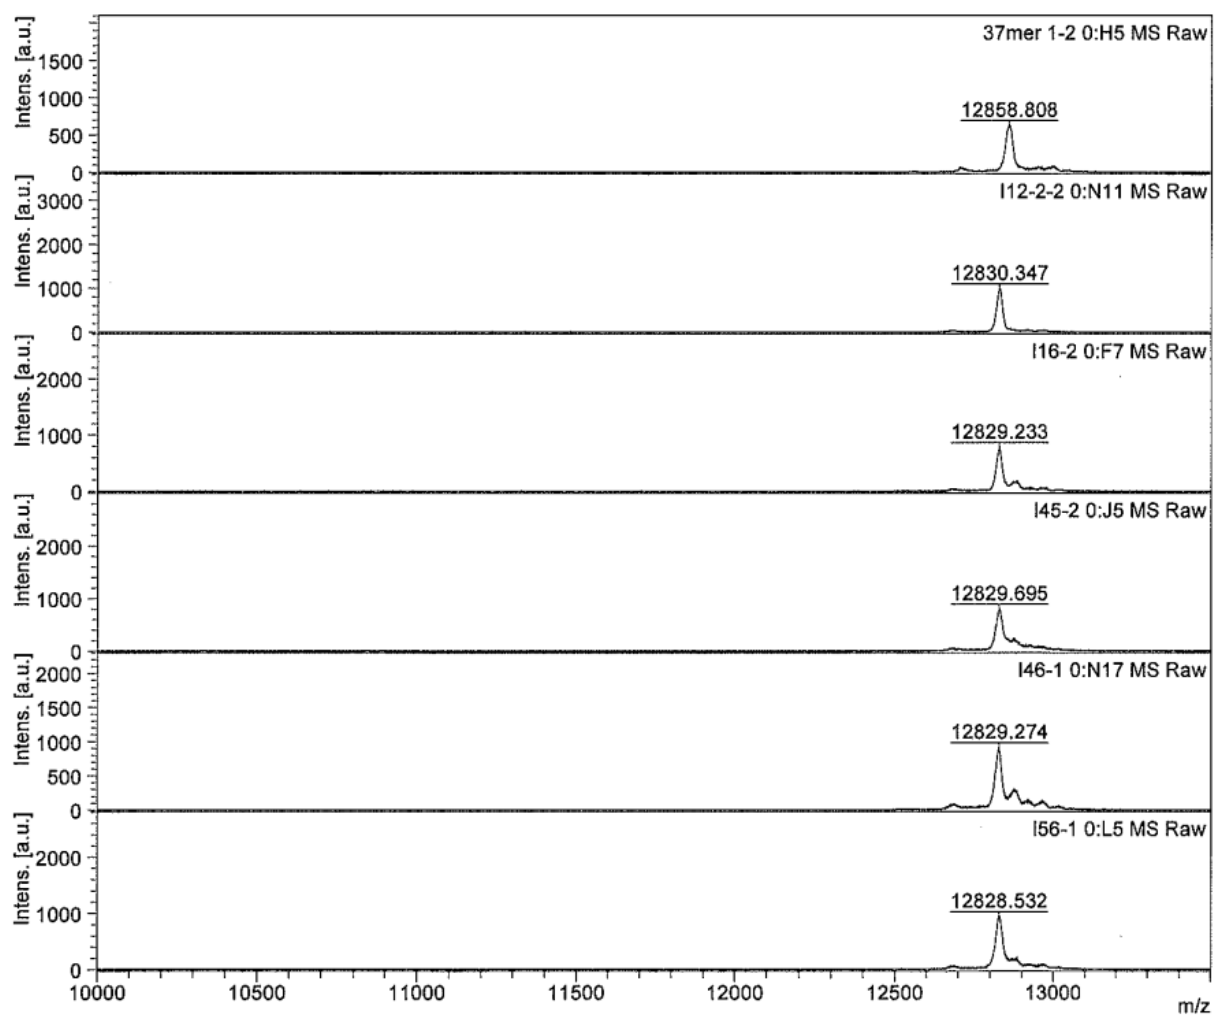

**Figure S1.** Mass spectra of *37htel*, I-1/2, I-1/6, I-4/5, I-4/6 and I-5/6 (from top to bottom).

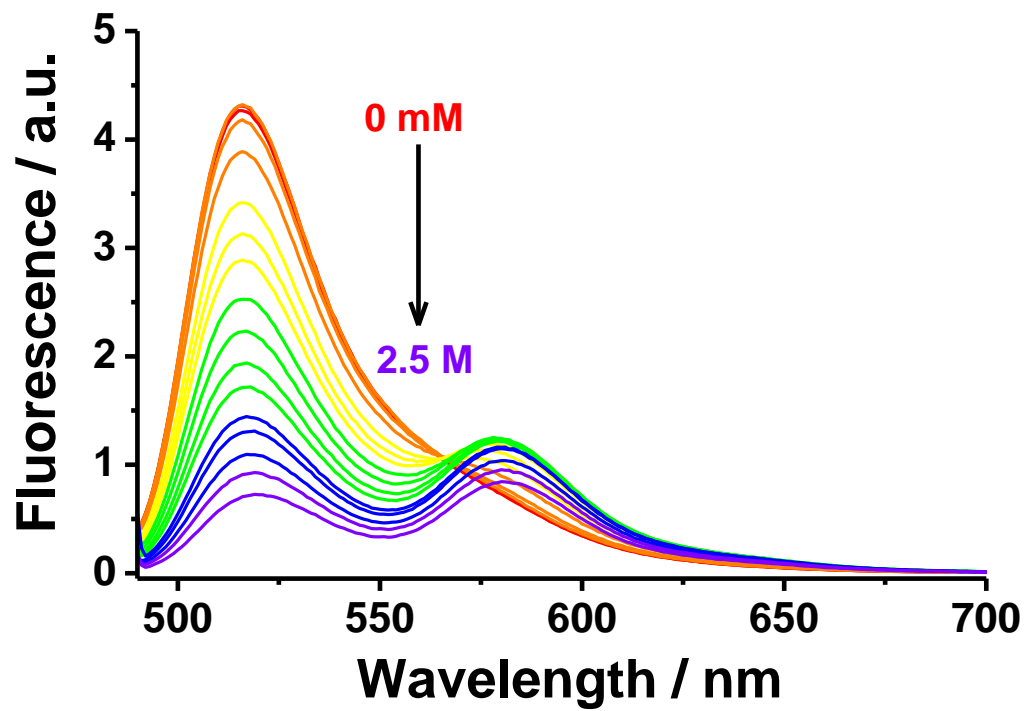

**Figure S2.** Changes in the fluorescence spectrum of *37htel* as a function of  $[K^+]$ . ( $[37htel] = 168$  nM;  $[K^+] = 0$  mM (red)  $\sim$  2.5 M (purple)).

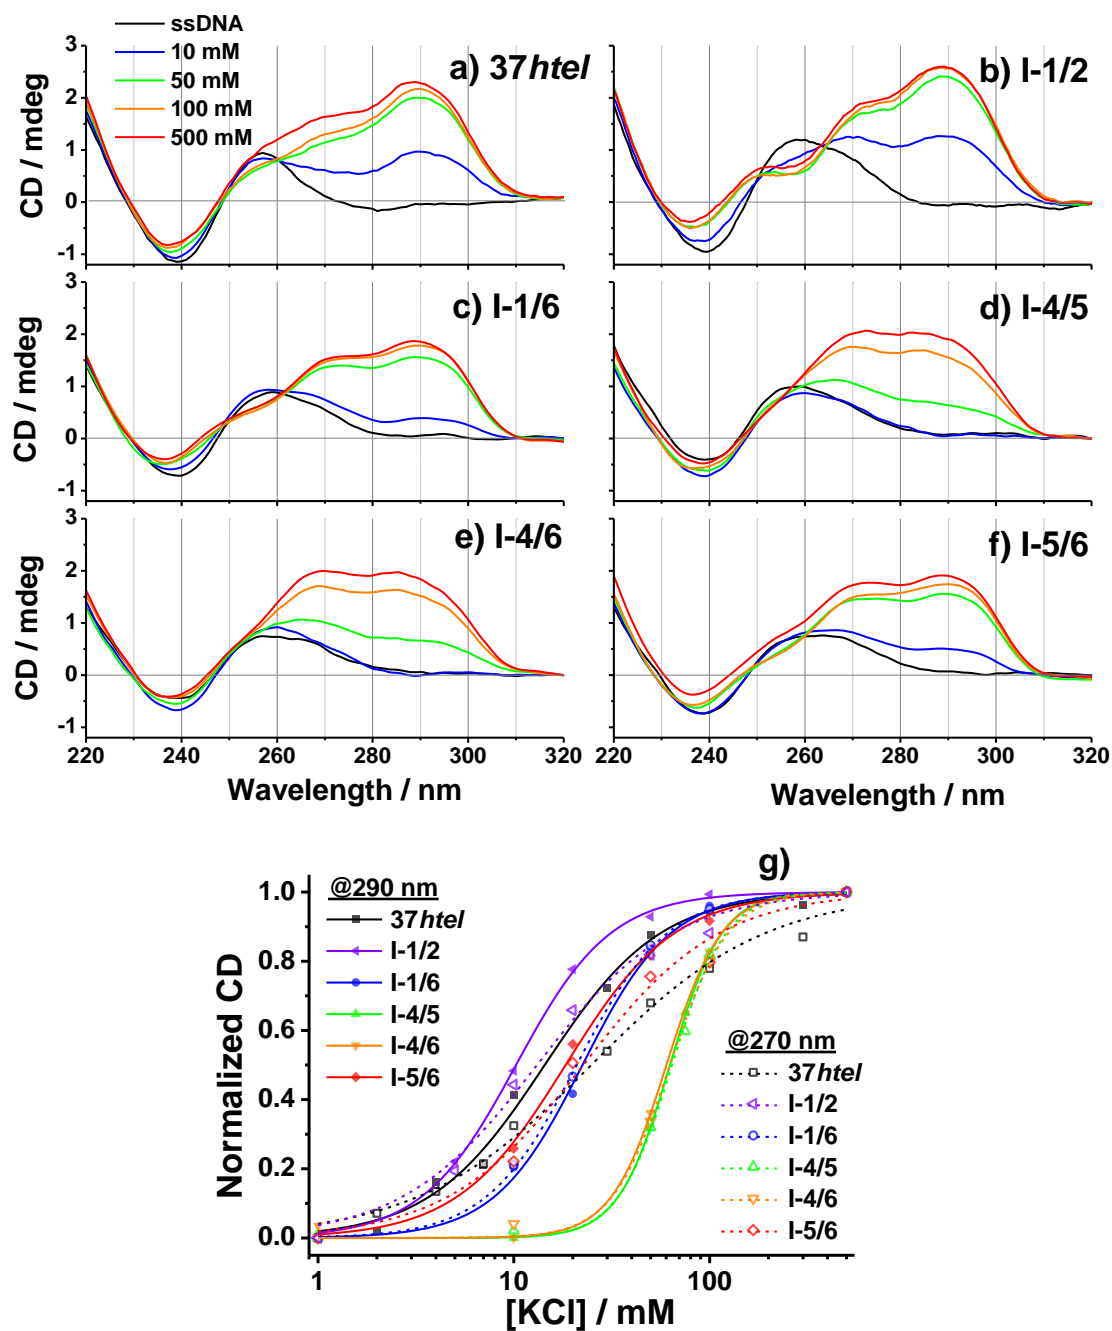

**Figure S3.** a-f) CD spectra of 37 $htel$ , I-1/2, I-1/6, I-4/5, I-4/6, and I-5/6 with various  $[K^+]$ . ( $[DNA] = 10 \mu M$ ). g) Changes in  $I_{CD}$  for 37 $htel$ , I-1/2, I-1/6, I-4/5, I-4/6, and I-5/6 as a function of  $[K^+]$ . Theoretical curves obtained from the fitting analysis are shown in straight lines.



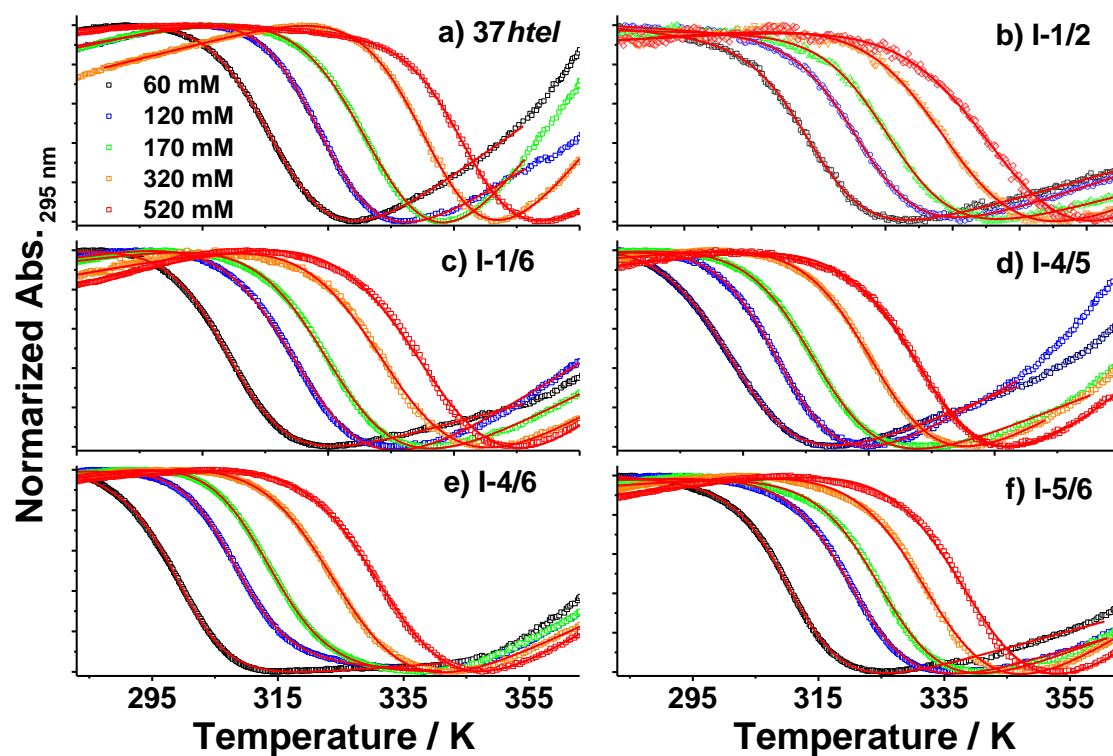

**Figure S4.** Thermal denaturation curves monitored at 295 nm measured for 37htel, I-1/2, I-1/6, I-4/5, I-4/6, and I-5/6 with various  $[K^+]$ . ( $[DNA] = 5 \mu M$ ). Theoretical fit obtained from the fitting analysis is shown in red.
